# Supplementary material
Source: PubMed Central journal article supplement (PMC3761306)
Supplement: 5ee007223e67d382cacb76df4d1c52fe_genetics.113.153205-3.pdf [file 5ee007223e67d382cacb76df4d1c52fe_genetics.113.153205-3.pdf]

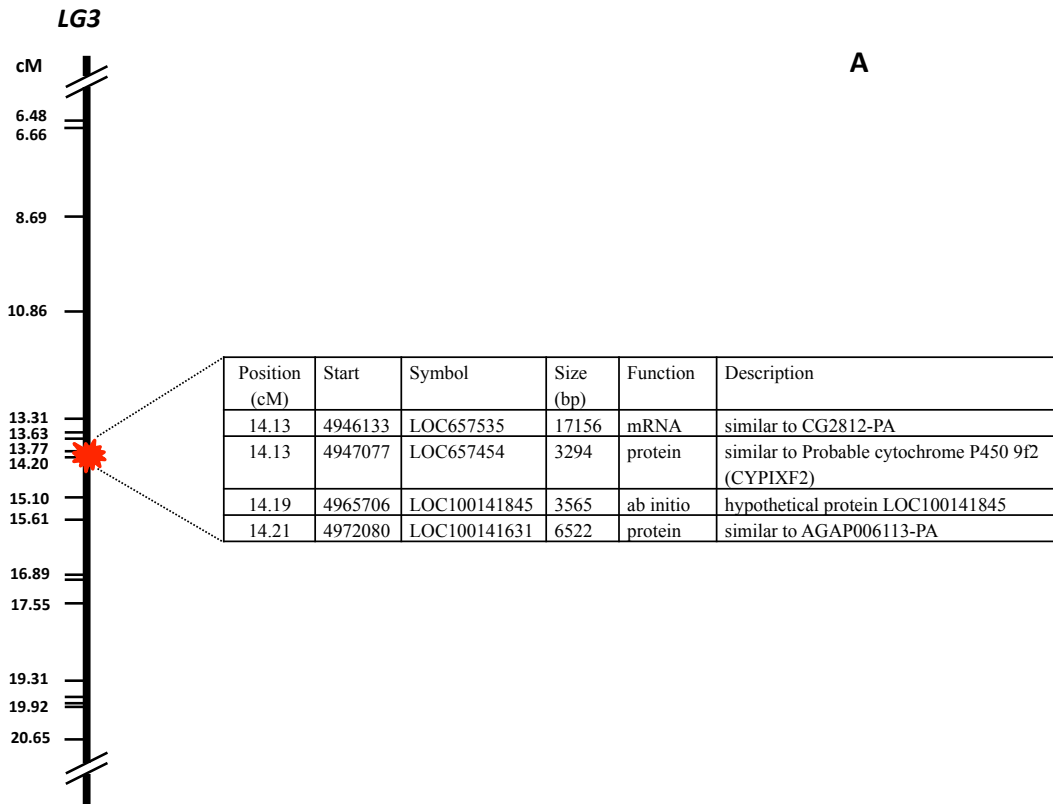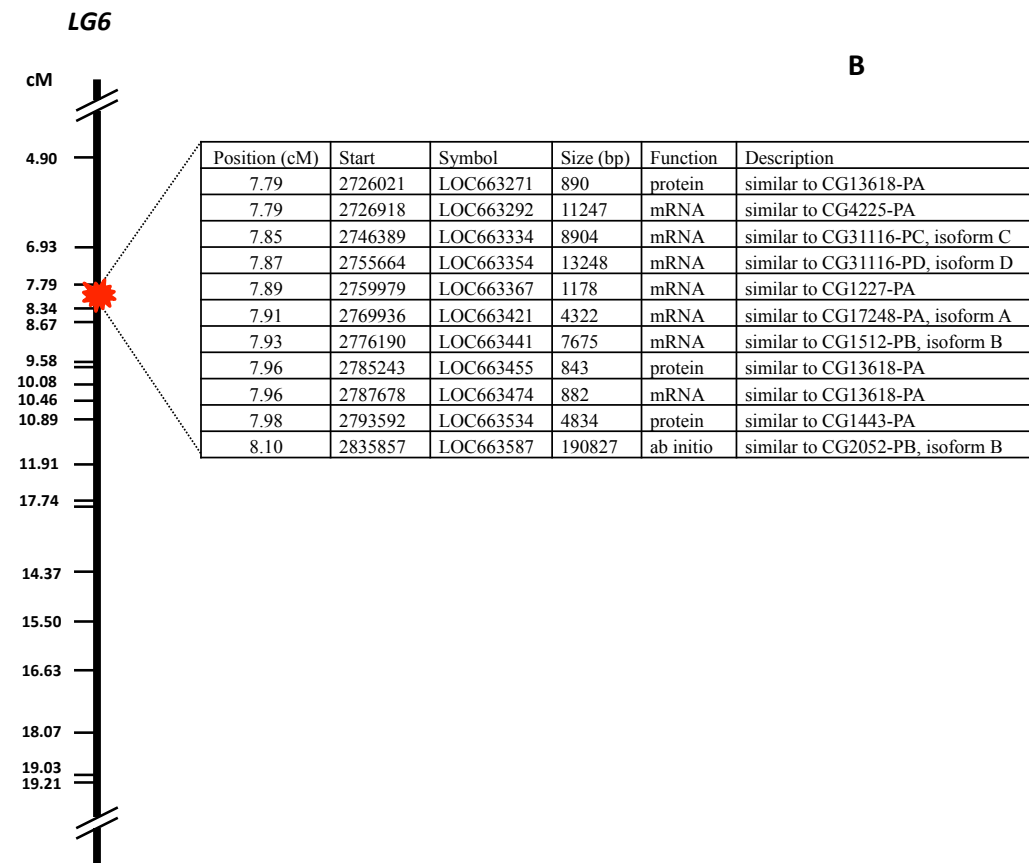

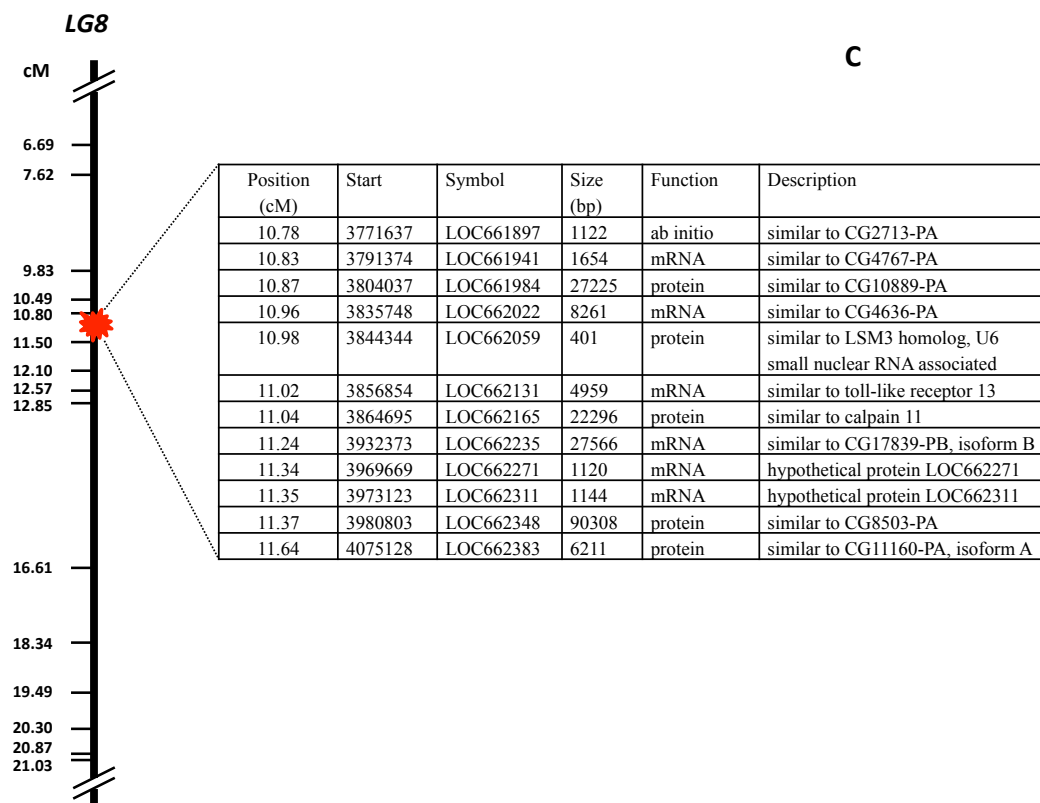

**Figure S1** Fine mapping of QTL on linkage group 3, 6 and 8. Results were scaled according to the physical position of markers on the *Tribolium castaneum* (red flour beetle) genome database. Tick marks appear at marker positions. **(A)** Linkage group 3 showing four protein coding genes located in the QTL region; **(B)** Linkage group 6 showing 11 genes located in the QTL region; and **(C)** Linkage group 8 showing 12 genes located in the QTL region.
