# Supplementary material
Source: PubMed Central journal article supplement (PMC3761306)
Supplement: 8d3b439221b93e985c903534af20cc10_genetics.113.153205-2.pdf [file 8d3b439221b93e985c903534af20cc10_genetics.113.153205-2.pdf]

**Table S1 Primer sequences of microsatellite, sequence-tagged site (STS), and single-strand conformational polymorphism (SSCP) markers used in the study for fine mapping beetle tapeworm parasite susceptibility QTL in *Tribolium castaneum*.**

| No. | Marker <sup>a</sup> | LG | cM    | Forward primer          | Reverse primer             | Motif (Repeats) | Size(bp) | Note <sup>b</sup>      |
|-----|---------------------|----|-------|-------------------------|----------------------------|-----------------|----------|------------------------|
| 1   | Tca3.2267           | 3  | 6.48  | GCCAGAACGCCAAATAAAAC    | TACGGTATGTTGCGGATTGA       | SSCP            | 191      | AC191 <sup>L</sup>     |
| 2   | Tca3.2331           | 3  | 6.66  | GGCCAACAATATAACAACCGA   | GAATCAGAGGCTGCTAACGTC      | A(12)           | 232      | This study             |
| 3   | Tca3.3038           | 3  | 8.69  | TGTGATTTTCTTTGGTTCAACG  | CAAATTGCATTGTGCGCATC       | SSCP            | 290      | 26.M03t <sup>L</sup>   |
| 4   | Tca3.3800           | 3  | 10.86 | GACCGAATGGCGTCTTACTC    | ACAATAAAAGCCTAGCTGGAGG     | T(12)           | 232      | This study             |
| 5   | Tca3.4657           | 3  | 13.31 | GCCGTCGTTTTATTCCAGA     | CTGGTTCGGTCTGTGGATT        | SSCP            | 258      | This study             |
| 6   | Tca3.4771           | 3  | 13.63 | GCCAACAGACGCGCTTTCATT   | ACGAGTTACCGCATCAGATTCCTTAT | CGG(5)          | 281      | S1031 <sup>L</sup>     |
| 7   | Tca3.4821           | 3  | 13.77 | CCAATGGTGAGAGGTCCCTA    | CATTCCGTAATCCGCAAAC        | SSCP            | 278      | This study             |
| 8   | Tca3.4924           | 3  | 14.07 | GGA CTGGACTTTCAAGCAG    | GTCGACGAAATGGGAAAGAA       | SSCP            | 219      | This study             |
| 9   | Tca3.4970           | 3  | 14.20 | GCCTGGGTGTCACTACTGTA    | TGGAGCACGATCAAAGAGTG       | SSCP            | 213      | This study             |
| 10  | Tca3.5286           | 3  | 15.10 | TTGCTGCTCCGAATGTATG     | CCCATATTTGCACTCAAGCA       | SSCP            | 317      | This study             |
| 11  | Tca3.5465           | 3  | 15.61 | GAATATCCGTCTGGCCGTA     | TGTGATTGCGAAACTCGAAG       | GGC(6)          | 202      | L2A8.377s <sup>Z</sup> |
| 12  | Tca3.5912           | 3  | 16.89 | GTATATTGCGTTTCGCTGGT    | GTCATCGTGAACGTTGTTGG       | SSCP            | 321      | This study             |
| 13  | Tca3.5953           | 3  | 17.01 | CGCAACTGCAAGAAAAATTG    | TTGGTTTTGCGTGTACGAG        | SSCP            | 204      | 25E11 <sup>L</sup>     |
| 14  | Tca3.6143           | 3  | 17.55 | ATCCGGCCAGTAAAAGTGTG    | CGCGCATAAATAAACCGAAT       | SSCP            | 228      | This study             |
| 15  | Tca3.6763           | 3  | 19.31 | TGTTTTGATTTCTCTTTGCAT   | AAGCACAATTGGTCAAACAAA      | T (16)          | 271      | Tca-3.45 <sup>D</sup>  |
| 16  | Tca3.6901           | 3  | 19.69 | ACCAATCGACCAGTTTTTC     | ACCGAGGTGGGCTTTAAACT       | SSCP            | 211      | 32.D14s <sup>L</sup>   |
| 17  | Tca3.6939           | 3  | 19.83 | TTCAATCAGTTTTCTTCTGTCAA | TACGATGCATTGGATTTTGG       | TAT (6)         | 239      | Tca-3.22 <sup>D</sup>  |
| 18  | Tca3.6972           | 3  | 19.92 | CCTCCTGAAAGGACACAGGA    | GGTGCAACTCGCTTCTTCAT       | TCA (5)         | 228      | Tca-3.11 <sup>D</sup>  |

|    |           |   |       |                           |                            |           |     |                       |
|----|-----------|---|-------|---------------------------|----------------------------|-----------|-----|-----------------------|
| 19 | Tca3.7226 | 3 | 20.65 | GGCAACCGCACTAAACACTT      | AAGTTGGCGCTTTAGGAACA       | SSCP      | 348 | This study            |
| 20 | Tca6.1708 | 6 | 4.90  | AAGGACAGGTTGTGTTTTAGG     | TCCCATTATAGCCCACTTCACT     | T(13)     | 108 | This study            |
| 21 | Tca6.2427 | 6 | 6.93  | CCAAAACCACAGAACTGCATA     | AGCTAGACTTCGCCTCCTCATT     | AAT(6)    | 118 | This study            |
| 22 | Tca6.2445 | 6 | 6.99  | CAGAAGCTATGAGAGCTGCAGTA   | TTAACAGAATTGCGGGAAAAA      | ATT (9)   | 187 | Tca-6.12 <sup>D</sup> |
| 23 | Tca6.2726 | 6 | 7.79  | GACACGCTCCAGCAAGTTTAC     | CGTAGCTCCAATAACAACCTCCC    | A(16)     | 159 | This study            |
| 24 | Tca6.2926 | 6 | 8.34  | AATTCAGCGTTTGCTGCT        | TGTTTGCATCGCTTGTCT         | AATT(4)   | 157 | This study            |
| 25 | Tca6.3003 | 6 | 8.67  | CACAGGCGTAGATTGGTTGTT     | TCAGGCTTACTTGGGTTAGCA      | TA(26)    | 215 | This study            |
| 26 | Tca6.3352 | 6 | 9.58  | AATTGGAAGGAAGTGTGGTG      | AAAAGTGCGATGATTACGTCT      | A(12)     | 226 | This study            |
| 27 | Tca6.3393 | 6 | 9.69  | GTCCATAAGCTGCATTTCGT      | TGGCGCAATTTTGTAACTGA       | SSCP      | 236 | This study            |
| 28 | Tca6.3527 | 6 | 10.08 | TGGCCTTAAATCGTCAATTTTT    | CAGAAATGCCAGCTGTTCTTC      | ATTTA(5)  | 255 | This study            |
| 29 | Tca6.3661 | 6 | 10.46 | GAAAACGCCAAATCGACATT      | TCGTTTATGTAGCCGGTGAA       | ATT(5)    | 222 | Tca-6.7 <sup>D</sup>  |
| 30 | Tca6.3810 | 6 | 10.89 | ATCATCTGGAGCGACAAACC      | GATTTATTTGCGGCGACCT        | A(16)     | 160 | This study            |
| 31 | Tca6.4168 | 6 | 11.91 | GATAAGGTAGGGCAGCTTCG      | GGGTGGGTACGAACAAGAAT       | T(13)     | 243 | This study            |
| 32 | Tca6.4460 | 6 | 12.74 | TCACCCTTATCTTCTCCGAT      | CATTTGGCCGATCTTCAGTC       | A(14)     | 230 | This study            |
| 33 | Tca6.4509 | 6 | 12.89 | ACCTGACCTGACCTGACCTG      | CGTCAGTTGTTTCTCGAAA        | CCTGA (4) | 186 | Tca-6.26 <sup>D</sup> |
| 34 | Tca6.5044 | 6 | 14.37 | AGATCCCAATGGGCAAATCT      | GCCGAAACTTTGGGTGATAA       | TCAAG (5) | 200 | Tca-6.18 <sup>D</sup> |
| 35 | Tca6.5425 | 6 | 15.50 | TTTTTGCTCAGAACACTCAAAA    | CCTTCATATGTGGAAGGAAACA     | ATT (5)   | 194 | Tca-6.16 <sup>D</sup> |
| 36 | Tca6.5819 | 6 | 16.63 | AAAATGCGTTTTTCACTCAAAT    | CCAACCTGCCATTATGAAC        | T (12)    | 206 | Tca-6.13 <sup>D</sup> |
| 37 | Tca6.6324 | 6 | 18.07 | AACGAGCCATAACCAGAGA       | TTTGGCGAAGAAAAGTAAAA       | A (13)    | 211 | Tca-6.4 <sup>D</sup>  |
| 38 | Tca6.6659 | 6 | 19.03 | TTGTTTGTAAAGATCAAGGCAAAA  | TGGTCACTCTTTTCGCTATGT      | GA (8)    | 194 | Tca-6.36 <sup>D</sup> |
| 39 | Tca6.6723 | 6 | 19.21 | AAATTATAAATCAAGCAGACAGGAG | TCCTGTATAAACGATTATGTTTTCAA | TAA (5)   | 205 | Tca-6.33 <sup>D</sup> |

|    |           |   |       |                          |                          |                |     |                       |
|----|-----------|---|-------|--------------------------|--------------------------|----------------|-----|-----------------------|
| 40 | Tca8.2341 | 8 | 6.69  | TTGTAGATTGTATTTGGCAAT    | GGAATCCTGGAATCTTAGAACG   | TTA (20)       | 194 | Tca-8.8 <sup>D</sup>  |
| 41 | Tca8.2668 | 8 | 7.62  | TAGGGTGATCCTGCTAAAAGTACC | TGGATCTAAACTTCGCCATA     | TAA (21)       | 188 | Tca-8.35 <sup>D</sup> |
| 42 | Tca8.3441 | 8 | 9.83  | TTTGGCATTCTCAAGGTCA      | GGTAGATGCGCTGGAATTTT     | AAT(8)-ATA(5)  | 244 | This study            |
| 43 | Tca8.3671 | 8 | 10.49 | TTTGAAATGGTTCAACACGC     | CTCCGCCTGTTTGTGGTAT      | AAT (7)        | 145 | Tca-8.14 <sup>D</sup> |
| 44 | Tca8.3781 | 8 | 10.80 | GGTTTAGCCAAAGGAACCTCG    | AAAGTTAACAACGCGAATGGA    | CCA(5)-CAA(4)  | 232 | This study            |
| 45 | Tca8.4007 | 8 | 11.50 | ATCTGTATCCGTTTGGTAAGC    | AGCTAGATTTTGCTCTTCACA    | TAA(6)-TAA(15) | 195 | This study            |
| 46 | Tca8.4236 | 8 | 12.10 | TGGGTAAAGTTGAAGTAGCCTTG  | GAAACGAAGTGAGAAAACGGA    | TTA(7)         | 181 | This study            |
| 47 | Tca8.4398 | 8 | 12.57 | TGTTTTGTTGATTTGAGTTTGTC  | TTCGCTTAATGAATGCCTCC     | TTA (23)       | 205 | Tca-8.16 <sup>D</sup> |
| 48 | Tca8.4517 | 8 | 12.85 | TGCATTACAGCGCTTAATTT     | TCAATGTACAGGCTGGTGTG     | A (15)         | 196 | Tca-8.48 <sup>D</sup> |
| 49 | Tca8.5815 | 8 | 16.61 | GGTTAAATAGGACAAAGTTGCG   | AGAACGCCTTGAAAAGGTA      | A(14)          | 157 | This study            |
| 50 | Tca8.6428 | 8 | 18.34 | TGTGAGGTCCCATGGTGTA      | ACATTTATTTGGTCCACAAGC    | T (15)         | 195 | Tca-8.22 <sup>D</sup> |
| 51 | Tca8.6819 | 8 | 19.49 | TAAACACACGTCCGGTTCCT     | TTTGTGTCGAGATACTGTTAGACG | CA(8)          | 180 | This study            |
| 52 | Tca8.7101 | 8 | 20.30 | AAAGCGCTGTTGCAAATTC      | ACCCACTCAGTAGCCAGTGC     | TTA(9)-TTA(5)  | 178 | Tca-8.32 <sup>D</sup> |
| 53 | Tca8.7305 | 8 | 20.87 | CCGGATAATGGAGTTTCA       | TCTCTTGCATGTGGTTTTT      | TTAA(4)        | 211 | This study            |
| 54 | Tca8.7359 | 8 | 21.03 | CCGAGCGAGGAGTATATGTTG    | GAACGCAAAACGACCAAATC     | CA(9)          | 215 | This study            |

Note: a: Markers are designated by the beetle species name *Tribolium castaneum* (Tca), genetic linkage group and location on linkage group. For example, marker Tca3.2267 represents the marker located at the 2267kb position on linkage group 3, whereas Tca6.1708 represents the marker located at the 1708kb position on linkage group 6. b: Reference L: Lorenzen et al 2005; D: Demuth et al 2007; Z: Zhong et al 2004. LG:Linkage Group; cM: centiMorgan.
