# Supplementary material
Source: PubMed Central journal article supplement (PMC3761306)
Supplement: ec834725ff914803d78f328792700030_genetics.113.153205-1.pdf [file ec834725ff914803d78f328792700030_genetics.113.153205-1.pdf]

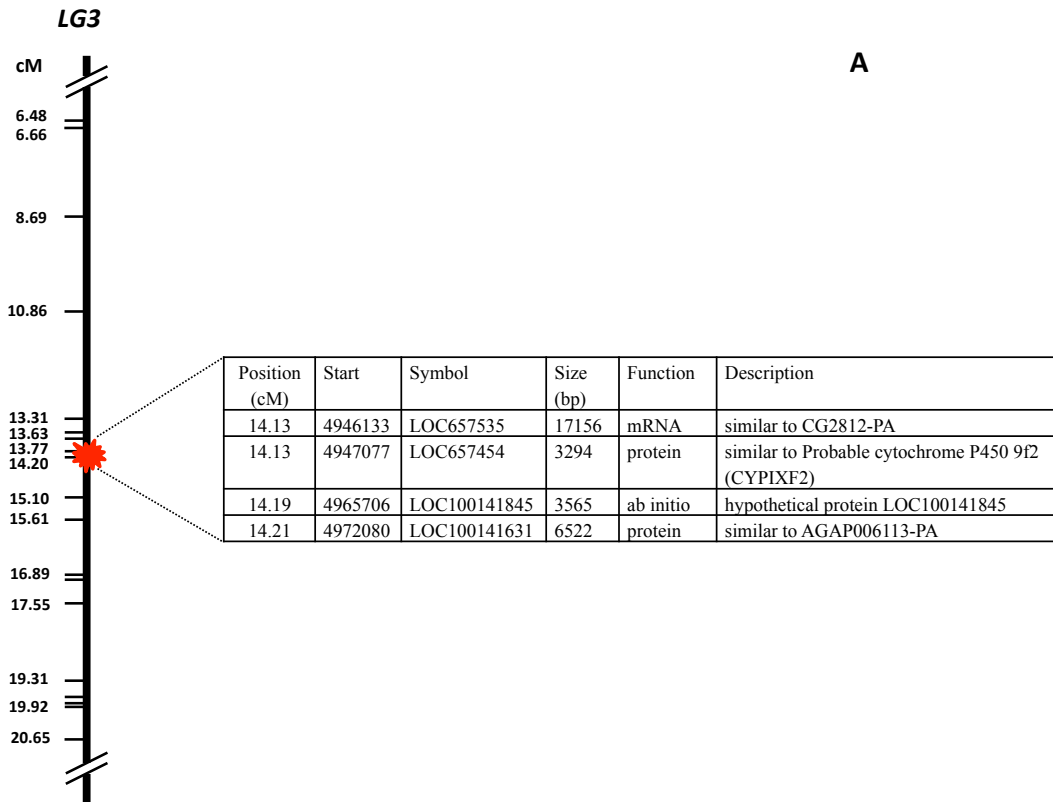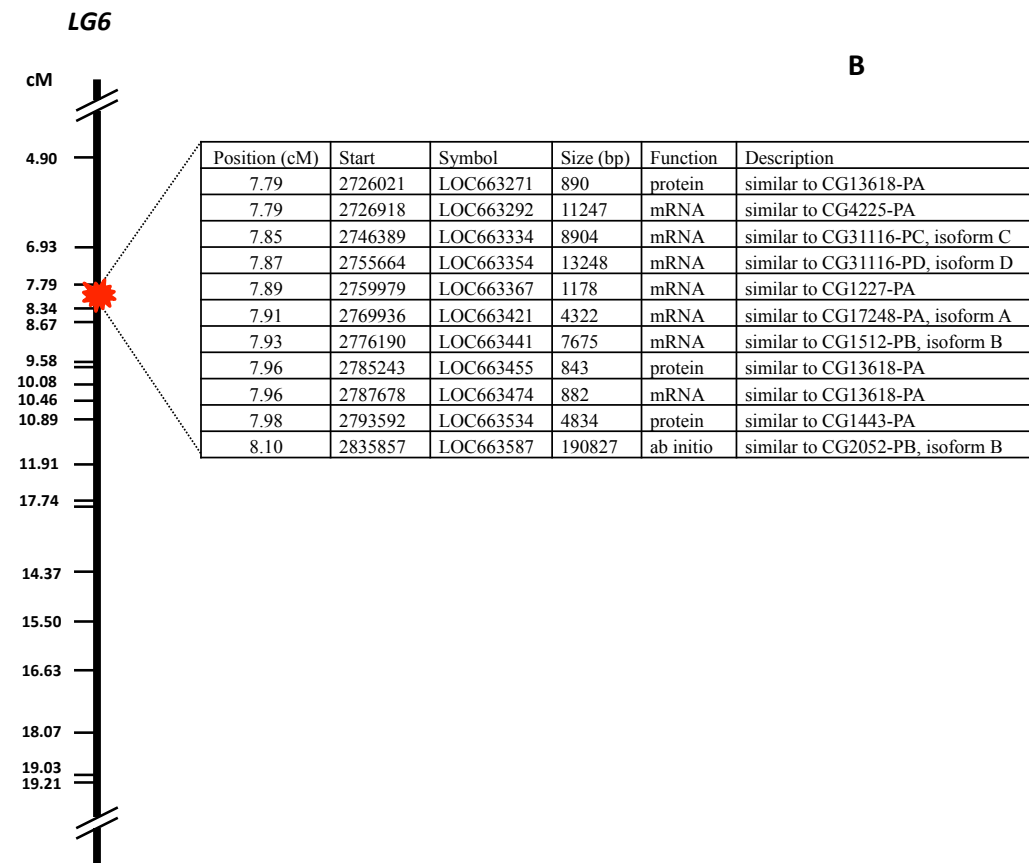

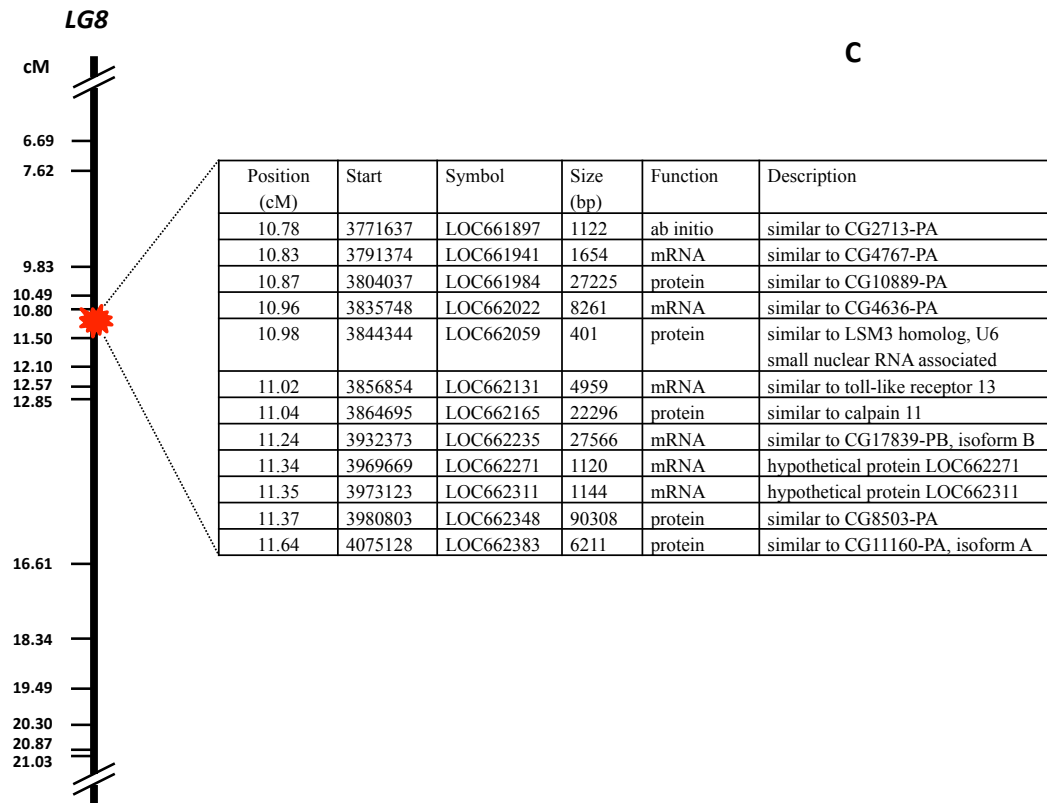

**Figure S1** Fine mapping of QTL on linkage group 3, 6 and 8. Results were scaled according to the physical position of markers on the *Tribolium castaneum* (red flour beetle) genome database. Tick marks appear at marker positions. **(A)** Linkage group 3 showing four protein coding genes located in the QTL region; **(B)** Linkage group 6 showing 11 genes located in the QTL region; and **(C)** Linkage group 8 showing 12 genes located in the QTL region.

**Table S1 Primer sequences of microsatellite, sequence-tagged site (STS), and single-strand conformational polymorphism (SSCP) markers used in the study for fine mapping beetle tapeworm parasite susceptibility QTL in *Tribolium castaneum*.**

| No. | Marker <sup>a</sup> | LG | cM    | Forward primer          | Reverse primer             | Motif (Repeats) | Size(bp) | Note <sup>b</sup>      |
|-----|---------------------|----|-------|-------------------------|----------------------------|-----------------|----------|------------------------|
| 1   | Tca3.2267           | 3  | 6.48  | GCCAGAACGCCAAATAAAAC    | TACGGTATGTTGCGGATTGA       | SSCP            | 191      | AC191 <sup>L</sup>     |
| 2   | Tca3.2331           | 3  | 6.66  | GGCCAACAATATAACAACCGA   | GAATCAGAGGCTGCTAACGTC      | A(12)           | 232      | This study             |
| 3   | Tca3.3038           | 3  | 8.69  | TGTGATTTTCTTTGGTTCAACG  | CAAATTGCATTGTGCGCATC       | SSCP            | 290      | 26.M03t <sup>L</sup>   |
| 4   | Tca3.3800           | 3  | 10.86 | GACCGAATGGCGTCTTACTC    | ACAATAAAAGCCTAGCTGGAGG     | T(12)           | 232      | This study             |
| 5   | Tca3.4657           | 3  | 13.31 | GCCGTCGTTTTATTTCCAGA    | CTGGTTCGGTCTGTGGATT        | SSCP            | 258      | This study             |
| 6   | Tca3.4771           | 3  | 13.63 | GCCAACAGACGCGCTTTCATT   | ACGAGTTACCGCATCAGATTCCTTAT | CGG(5)          | 281      | S1031 <sup>L</sup>     |
| 7   | Tca3.4821           | 3  | 13.77 | CCAATGGTGAGAGGTCCCTA    | CATTCCGTAATCCGCAAAC        | SSCP            | 278      | This study             |
| 8   | Tca3.4924           | 3  | 14.07 | GGA CTG GACTTTCAAGCAG   | GTCGACGAAATGGGAAAGAA       | SSCP            | 219      | This study             |
| 9   | Tca3.4970           | 3  | 14.20 | GCCTGGGTGTCACTACTGTA    | TGGAGCACGATCAAAGAGTG       | SSCP            | 213      | This study             |
| 10  | Tca3.5286           | 3  | 15.10 | TTGCTGCTCCGAATGTATG     | CCCATATTTGCACTCAAGCA       | SSCP            | 317      | This study             |
| 11  | Tca3.5465           | 3  | 15.61 | GAATATCCGTCTGGCCGTA     | TGTGATTGCGAAACTCGAAG       | GGC(6)          | 202      | L2A8.377s <sup>Z</sup> |
| 12  | Tca3.5912           | 3  | 16.89 | GTATATTGCGTTTCGCTGGT    | GTCATCGTGAACGTTGTTGG       | SSCP            | 321      | This study             |
| 13  | Tca3.5953           | 3  | 17.01 | CGCAACTGCAAGAAAAATTG    | TTGGTTTTGCGTGTACGAG        | SSCP            | 204      | 25E11 <sup>L</sup>     |
| 14  | Tca3.6143           | 3  | 17.55 | ATCCGGCCAGTAAAAGTGTG    | CGCGCATAAATAAACCGAAT       | SSCP            | 228      | This study             |
| 15  | Tca3.6763           | 3  | 19.31 | TGTTTTGATTTCTCTTTGCAT   | AAGCACAATTGGTCAAACAAA      | T(16)           | 271      | Tca-3.45 <sup>D</sup>  |
| 16  | Tca3.6901           | 3  | 19.69 | ACCAATCGACCAGTTTTTC     | ACCGAGTGGGCTTTAAACT        | SSCP            | 211      | 32.D14s <sup>L</sup>   |
| 17  | Tca3.6939           | 3  | 19.83 | TTCAATCAGTTTTCTTCTGTCAA | TACGATGCATTGGATTTTGG       | TAT(6)          | 239      | Tca-3.22 <sup>D</sup>  |
| 18  | Tca3.6972           | 3  | 19.92 | CCTCCTGAAAGGACACAGGA    | GGTGCAACTCGCTTCTTCAT       | TCA(5)          | 228      | Tca-3.11 <sup>D</sup>  |

|    |           |   |       |                           |                            |           |     |                       |
|----|-----------|---|-------|---------------------------|----------------------------|-----------|-----|-----------------------|
| 19 | Tca3.7226 | 3 | 20.65 | GGCAACCGCACTAAACACTT      | AAGTTGGCGCTTTAGGAACA       | SSCP      | 348 | This study            |
| 20 | Tca6.1708 | 6 | 4.90  | AAGGACAGGTTGTGTTTTAGG     | TCCCATTATAGCCCACTTCACT     | T(13)     | 108 | This study            |
| 21 | Tca6.2427 | 6 | 6.93  | CCAAAACCACAGAAGCTGCATA    | AGCTAGACTTCGCCTCCTCATT     | AAT(6)    | 118 | This study            |
| 22 | Tca6.2445 | 6 | 6.99  | CAGAAGCTATGAGAGCTGCAGTA   | TTAACAGAATTGCGGGAAAAA      | ATT (9)   | 187 | Tca-6.12 <sup>D</sup> |
| 23 | Tca6.2726 | 6 | 7.79  | GACACGCTCCAGCAAGTTTAC     | CGTAGCTCCAATAACAACCTCCC    | A(16)     | 159 | This study            |
| 24 | Tca6.2926 | 6 | 8.34  | AATTCAGCGTTTGCTGCT        | TGTTTGCATCGCTTGTCT         | AATT(4)   | 157 | This study            |
| 25 | Tca6.3003 | 6 | 8.67  | CACAGGCGTAGATTGGTTGTT     | TCAGGCTTACTTGGGTTAGCA      | TA(26)    | 215 | This study            |
| 26 | Tca6.3352 | 6 | 9.58  | AATTGGAAGGAAGTGTGGTG      | AAAAGTGCGATGATTACGTCT      | A(12)     | 226 | This study            |
| 27 | Tca6.3393 | 6 | 9.69  | GTCCATAAGCTGCATTTCGT      | TGGCGCAATTTTGTAACTGA       | SSCP      | 236 | This study            |
| 28 | Tca6.3527 | 6 | 10.08 | TGGCCTTAAATCGTCAATTTTT    | CAGAAATGCCAGCTGTTCTTC      | ATTTA(5)  | 255 | This study            |
| 29 | Tca6.3661 | 6 | 10.46 | GAAAACGCCAAATCGACATT      | TCGTTTATGTAGCCGGTGAA       | ATT(5)    | 222 | Tca-6.7 <sup>D</sup>  |
| 30 | Tca6.3810 | 6 | 10.89 | ATCATCTGGAGCGACAAACC      | GATTTATTTGCGGCGACCT        | A(16)     | 160 | This study            |
| 31 | Tca6.4168 | 6 | 11.91 | GATAAGGTAGGGCAGCTTCG      | GGGTGGGTACGAACAAGAAT       | T(13)     | 243 | This study            |
| 32 | Tca6.4460 | 6 | 12.74 | TCACCCTTATCTTCTCCGAT      | CATTTGGCCGATCTTCAGTC       | A(14)     | 230 | This study            |
| 33 | Tca6.4509 | 6 | 12.89 | ACCTGACCTGACCTGACCTG      | CGTCAGTTGTTTCTCGAAA        | CCTGA (4) | 186 | Tca-6.26 <sup>D</sup> |
| 34 | Tca6.5044 | 6 | 14.37 | AGATCCCAATGGGCAAATCT      | GCCGAAACTTTGGGTGATAA       | TCAAG (5) | 200 | Tca-6.18 <sup>D</sup> |
| 35 | Tca6.5425 | 6 | 15.50 | TTTTTGCTCAGAAGCACTCAAAA   | CCTTCATATGTGGAAGGAAACA     | ATT (5)   | 194 | Tca-6.16 <sup>D</sup> |
| 36 | Tca6.5819 | 6 | 16.63 | AAAATGCGTTTTTCACTCAAAT    | CCAACCTGCCATTATGAAC        | T (12)    | 206 | Tca-6.13 <sup>D</sup> |
| 37 | Tca6.6324 | 6 | 18.07 | AACGAGCCATAACCAGAGA       | TTTGGCGAAGAAAAGTAAAA       | A (13)    | 211 | Tca-6.4 <sup>D</sup>  |
| 38 | Tca6.6659 | 6 | 19.03 | TTGTTTGTAAAGATCAAGGCAAAA  | TGGTCACTCTTTTTCGCTATGT     | GA (8)    | 194 | Tca-6.36 <sup>D</sup> |
| 39 | Tca6.6723 | 6 | 19.21 | AAATTATAAATCAAGCAGACAGGAG | TCCTGTATAAACGATTATGTTTTCAA | TAA (5)   | 205 | Tca-6.33 <sup>D</sup> |

|    |           |   |       |                          |                          |                |     |                       |
|----|-----------|---|-------|--------------------------|--------------------------|----------------|-----|-----------------------|
| 40 | Tca8.2341 | 8 | 6.69  | TTGTAGATTGTATTTGGCAAT    | GGAATCCTGGAATCTTAGAACG   | TTA (20)       | 194 | Tca-8.8 <sup>D</sup>  |
| 41 | Tca8.2668 | 8 | 7.62  | TAGGGTGATCCTGCTAAAAGTACC | TGGATCTAAACTTCGCCATA     | TAA (21)       | 188 | Tca-8.35 <sup>D</sup> |
| 42 | Tca8.3441 | 8 | 9.83  | TTTGGCATTCTCAAGGTCA      | GGTAGATGCGCTGGAATTTT     | AAT(8)-ATA(5)  | 244 | This study            |
| 43 | Tca8.3671 | 8 | 10.49 | TTTGAAATGGTTCAACACGC     | CTCCGCCTGTTTGTGGTAT      | AAT (7)        | 145 | Tca-8.14 <sup>D</sup> |
| 44 | Tca8.3781 | 8 | 10.80 | GGTTTAGCCAAAGGAACCTCG    | AAAGTTAACAACGCGAATGGA    | CCA(5)-CAA(4)  | 232 | This study            |
| 45 | Tca8.4007 | 8 | 11.50 | ATCTGTATCCGTTTGGTAAGC    | AGCTAGATTTTGCCTTTCACA    | TAA(6)-TAA(15) | 195 | This study            |
| 46 | Tca8.4236 | 8 | 12.10 | TGGGTAAAGTTGAAGTAGCCTTG  | GAAACGAAGTGAGAAAACGGA    | TTA(7)         | 181 | This study            |
| 47 | Tca8.4398 | 8 | 12.57 | TGTTTTGTTGATTTGAGTTTGTC  | TTCGCTTAATGAATGCCTCC     | TTA (23)       | 205 | Tca-8.16 <sup>D</sup> |
| 48 | Tca8.4517 | 8 | 12.85 | TGCATTACAGCGCTTAATTT     | TCAATGTACAGGCTGGTGTG     | A (15)         | 196 | Tca-8.48 <sup>D</sup> |
| 49 | Tca8.5815 | 8 | 16.61 | GGTTAAATAGGACAAAGTTGCG   | AGAACGCCTTGGAAAAGGTA     | A(14)          | 157 | This study            |
| 50 | Tca8.6428 | 8 | 18.34 | TGTGAGGTCCCATGGTGTA      | ACATTTATTTGGTCCACAAGC    | T (15)         | 195 | Tca-8.22 <sup>D</sup> |
| 51 | Tca8.6819 | 8 | 19.49 | TAAACACACGTCCGGTTCCT     | TTTGTGTCGAGATACTGTTAGACG | CA(8)          | 180 | This study            |
| 52 | Tca8.7101 | 8 | 20.30 | AAAGCGCTGTTGCAAATTC      | ACCCACTCAGTAGCCAGTGC     | TTA(9)-TTA(5)  | 178 | Tca-8.32 <sup>D</sup> |
| 53 | Tca8.7305 | 8 | 20.87 | CCGGATAATGGAGTTTCA       | TCTCTTGCATGTGGGTTTT      | TTAA(4)        | 211 | This study            |
| 54 | Tca8.7359 | 8 | 21.03 | CCGAGCGAGGAGTATATGTTG    | GAACGCAAACGACCAAATC      | CA(9)          | 215 | This study            |

Note: a: Markers are designated by the beetle species name *Tribolium castaneum* (Tca), genetic linkage group and location on linkage group. For example, marker Tca3.2267 represents the marker located at the 2267kb position on linkage group 3, whereas Tca6.1708 represents the marker located at the 1708kb position on linkage group 6. b: Reference L: Lorenzen et al 2005; D: Demuth et al 2007; Z: Zhong et al 2004. LG:Linkage Group; cM: centiMorgan.
